# Supplementary material for: Design, synthesis and molecular docking of novel bipyrazolyl thiazolone scaffold as a new class of antibacterial agents
Source: Royal Society of Chemistry journal article supplement (doi:10.1039/c4md00238e), 2014-07-31
Supplement: c4md00238e1.pdf [file c4md00238e1.pdf]

**Design, synthesis and molecular docking of novel bipyrazolyl thiazolone  
scaffold as a new class of antibacterial agents**

*Piyush N. Kalaria<sup>a\*</sup>, Jigar A. Makawana<sup>b</sup>, Shailesh P. Satasia<sup>a</sup>, Dipak K. Raval<sup>a</sup>, Hai-Liang Zhu<sup>b</sup>*

*<sup>a</sup>Department of Chemistry, Sardar Patel University, Vallabh Vidyanagar- 388 120, Gujarat, India*

*<sup>b</sup>State Key Laboratory of Pharmaceutical Biotechnology, Nanjing University, Nanjing 210093,*

*China*

*\*Corresponding author. Tel.: +91-02692-226856 - Ext. - 211; Fax: +91-02692 236475.*

*E-mail: [piyush\\_kalaria@yahoo.com](mailto:piyush_kalaria@yahoo.com)*

Supplementary Information

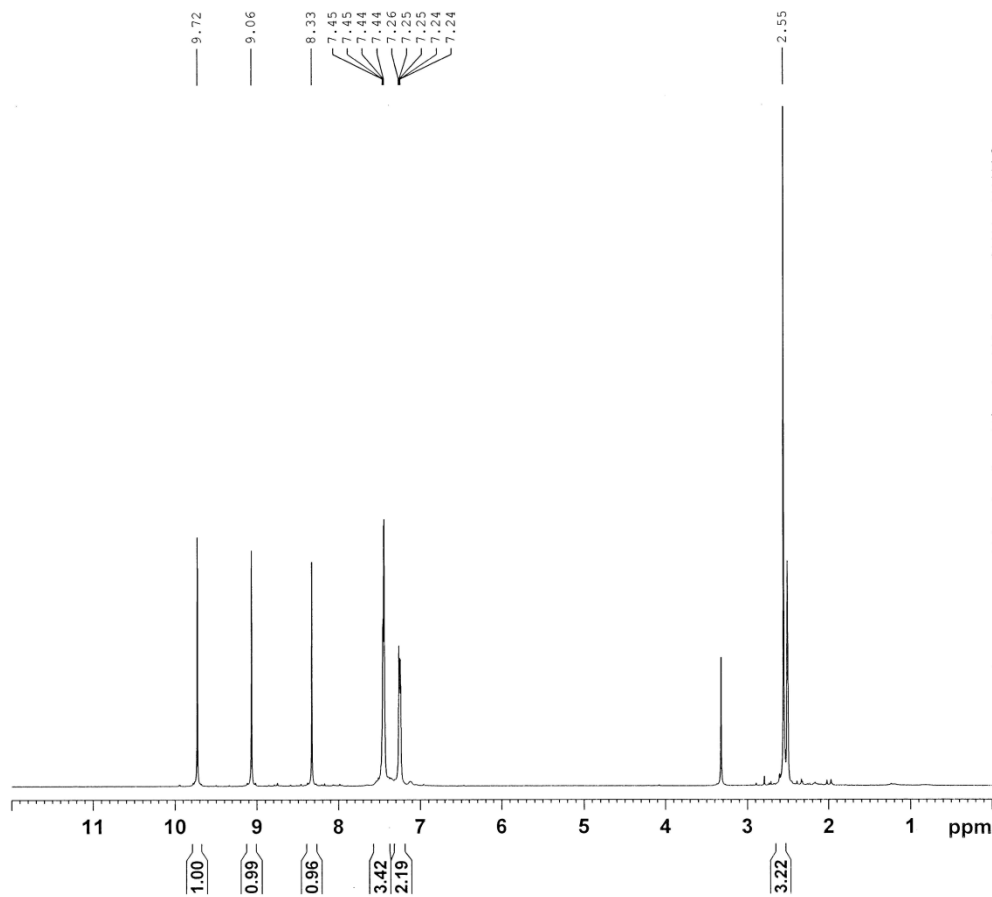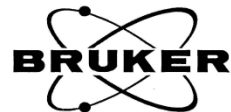

Current Data Parameters  
 NAME DKR  
 EXPNO 766  
 PROCNO 1

F2 - Acquisition Parameters  
 Date\_ 20130627  
 Time\_ 12.04  
 INSTRUM spect  
 PROBHD 5 mm BBO BB-1H  
 PULPROG zg30  
 TD 65536  
 SOLVENT DMSO  
 NS 16  
 DS 2  
 SWH 8278.146 Hz  
 FIDRES 0.126314 Hz  
 AQ 3.9584243 sec  
 RG 362  
 DW 60.400 usec  
 DE 6.00 usec  
 TE 298.2 K  
 D1 1.00000000 sec  
 TD0 1

==== CHANNEL f1 =====  
 NUC1 1H  
 P1 13.00 usec  
 PL1 -1.00 dB  
 SFO1 400.1324710 MHz

F2 - Processing parameters  
 SI 32768  
 SF 400.1300000 MHz  
 WDW EM  
 SSB 0  
 LB 0.30 Hz  
 GB 0  
 PC 1.00

<sup>1</sup>H NMR spectra of compound 3a

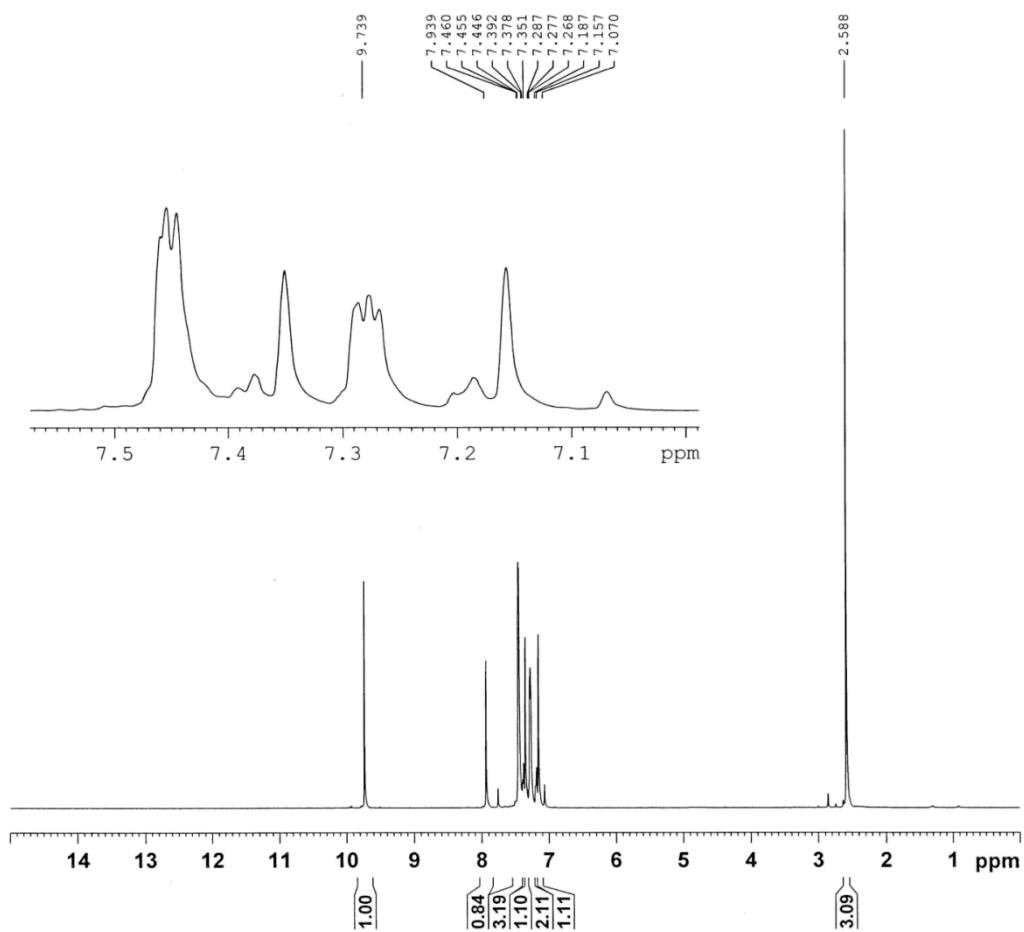

<sup>1</sup>H NMR spectra of compound **3b**

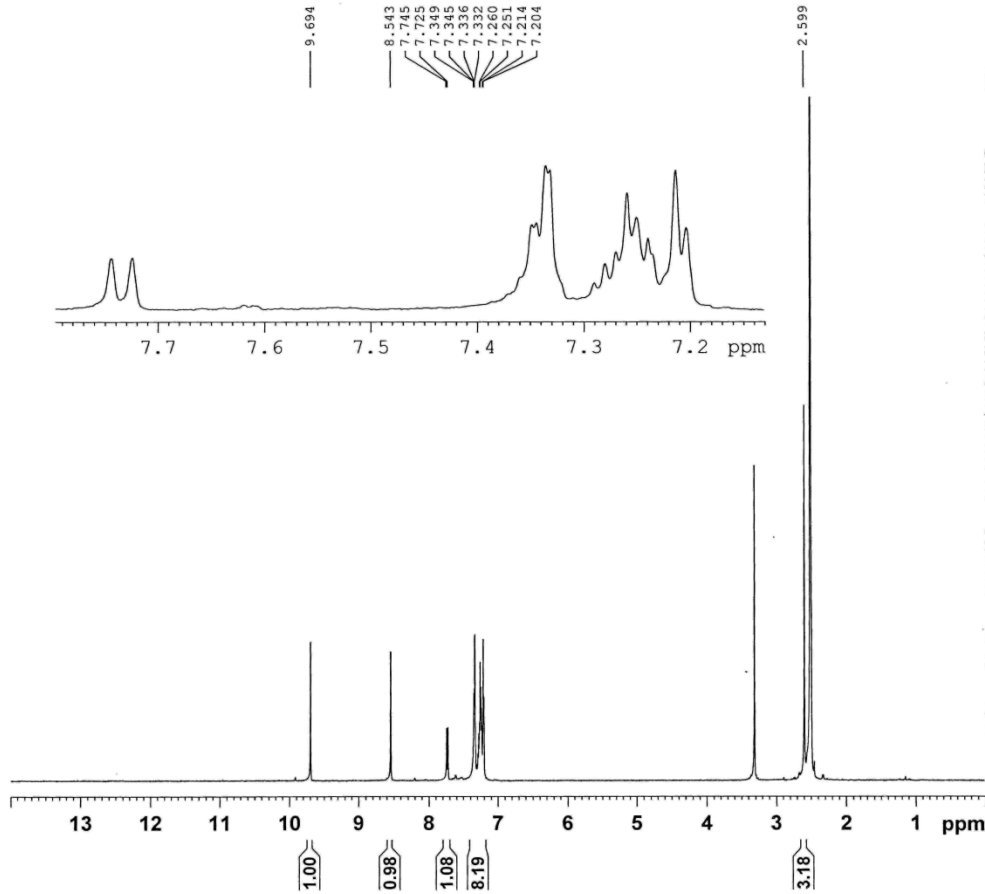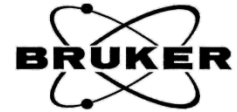

Current Data Parameters  
 NAME DKR  
 EXPNO 762  
 PROCNO 1

F2 - Acquisition Parameters  
 Date\_ 20130529  
 Time\_ 15.13  
 INSTRUM spect  
 PROBHD 5 mm BBO BB-1H  
 PULPROG zg30  
 TD 65536  
 SOLVENT DMSO  
 NS 16  
 DS 2  
 SWH 8278.146 Hz  
 FIDRES 0.126314 Hz  
 AQ 3.9584243 sec  
 RG 1149.4  
 DW 60.400 usec  
 DE 6.00 usec  
 TE 298.1 K  
 D1 1.00000000 sec  
 TD0 1

===== CHANNEL f1 =====  
 NUC1 1H  
 P1 13.00 usec  
 PL1 -1.00 dB  
 SFO1 400.1324710 MHz

F2 - Processing parameters  
 SI 32768  
 SF 400.1300000 MHz  
 WDW EM  
 SSB 0  
 LB 0.30 Hz  
 GB 0  
 PC 1.00

<sup>1</sup>H NMR spectra of compound **3c**

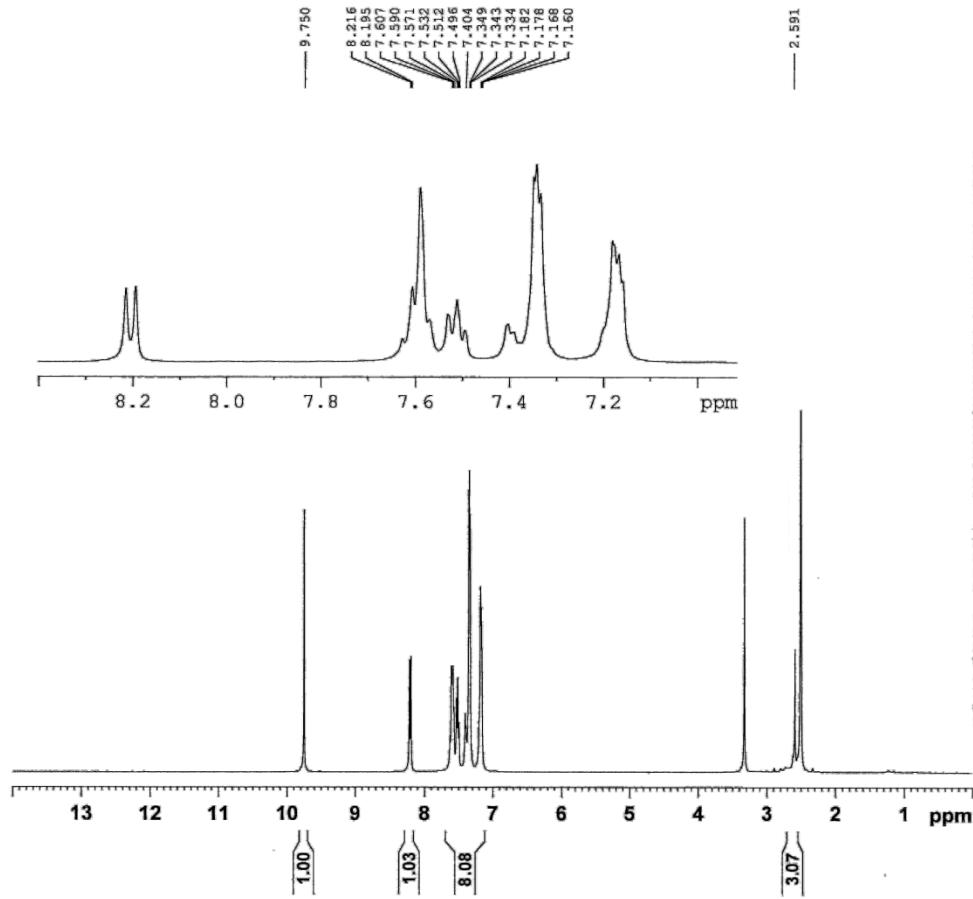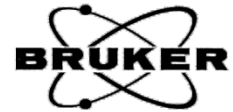

Current Data Parameters  
 NAME DKR  
 EXPNO 760  
 PROCNO 1

F2 - Acquisition Parameters  
 Date 20130529  
 Time 14.56  
 INSTRUM spect  
 PROBHD 5 mm BBO BB-1H  
 PULPROG zg30  
 TD 65536  
 SOLVENT DMSO  
 NS 16  
 DS 2  
 SWH 8278.146 Hz  
 FIDRES 0.126314 Hz  
 AQ 3.9584243 sec  
 RG 362  
 DW 60.400 usec  
 DE 6.00 usec  
 TE 298.1 K  
 D1 1.0000000 sec  
 TDO 1

===== CHANNEL f1 =====  
 NUC1 1H  
 P1 13.00 usec  
 PL1 -1.00 dB  
 SF01 400.1324710 MHz

F2 - Processing parameters  
 SI 32768  
 SF 400.1300000 MHz  
 WDW EM  
 SSB 0  
 LB 0.30 Hz  
 GB 0  
 PC 1.00

<sup>1</sup>H NMR spectra of compound **3d**

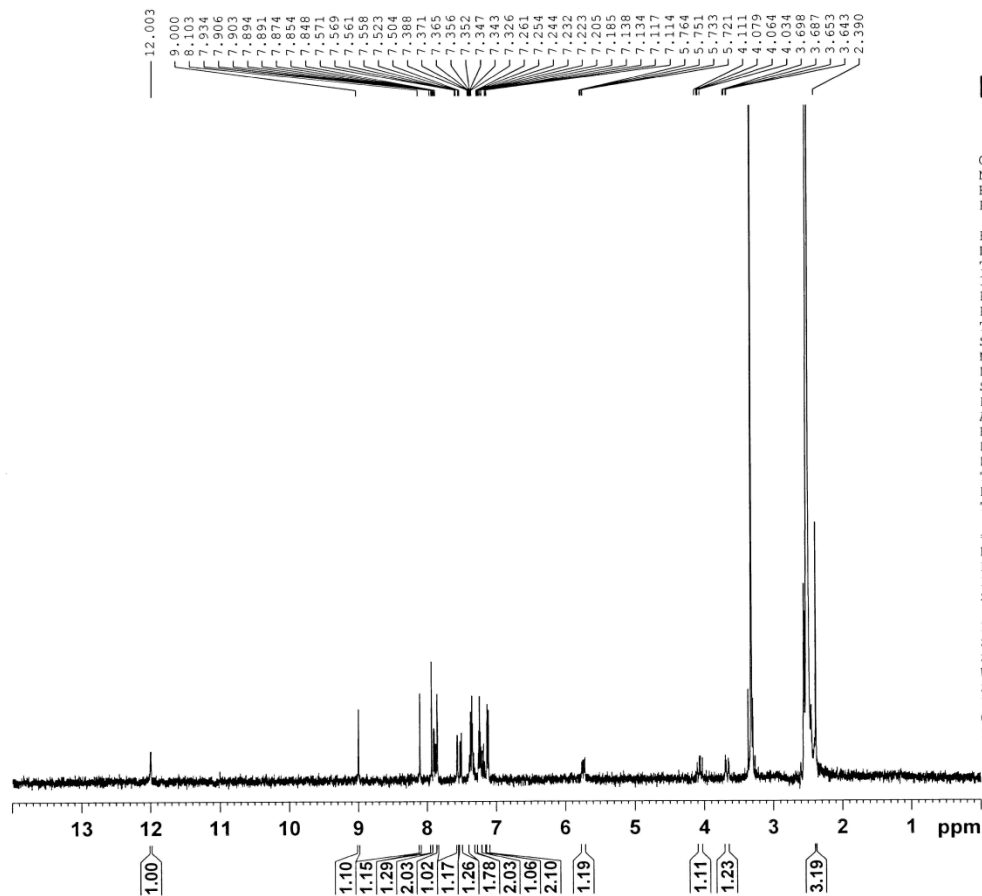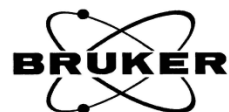

Current Data Parameters  
NAME DKR  
EXPNO 9  
PROCNO 1

F2 - Acquisition Parameters  
Date\_ 20140212  
Time 15.18  
INSTRUM spect  
PROBHD 5 mm BBO BB-1H  
PULPROG zg30  
TD 65536  
SOLVENT DMSO  
NS 16  
DS 2  
SWH 8278.146 Hz  
FIDRES 0.126314 Hz  
AQ 3.9584243 sec  
RG 1824.6  
DW 60.400 usec  
DE 6.00 usec  
TE 298.2 K  
D1 1.00000000 sec  
TD0 1

===== CHANNEL f1 =====  
NUC1 1H  
P1 13.00 usec  
PL1 -1.00 dB  
SFO1 400.1324710 MHz

F2 - Processing parameters  
SI 32768  
SF 400.1300000 MHz  
WDW EM  
SSB 0  
LB 0.30 Hz  
GB 0  
PC 1.00

$^1\text{H}$  NMR spectra of compound **10a**

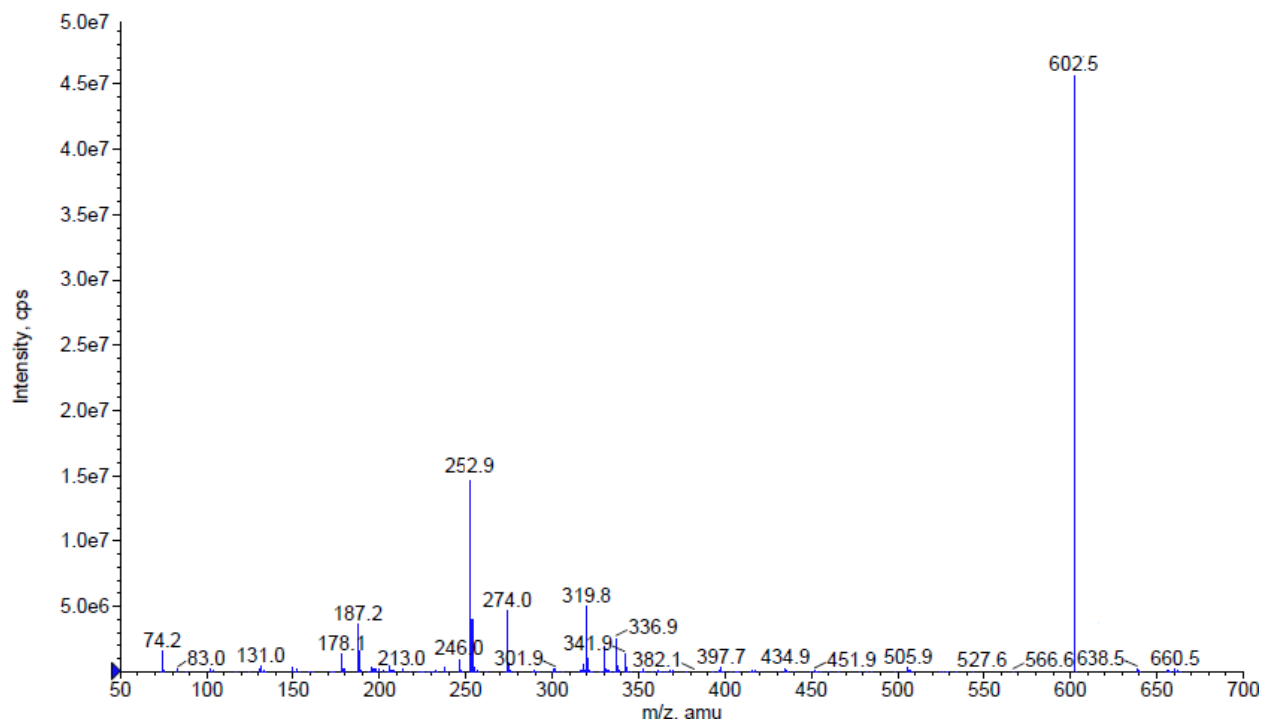

Mass spectra of compound **10a**

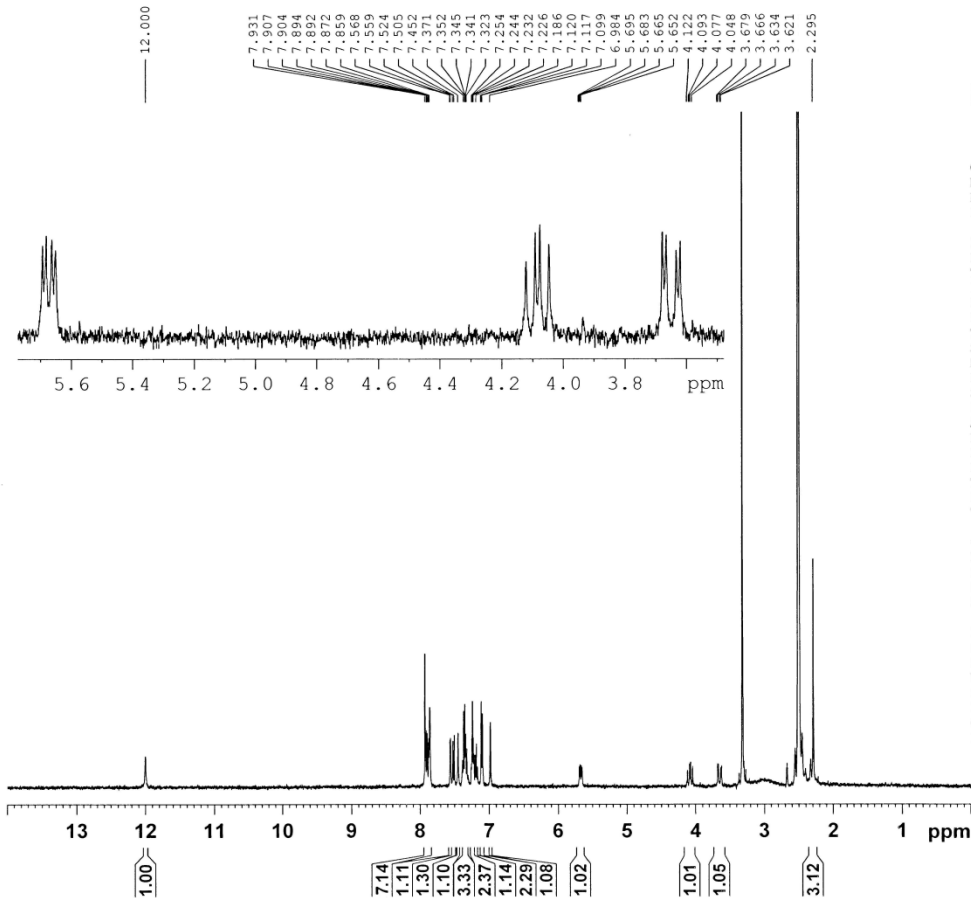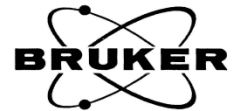

Current Data Parameters  
 NAME DKR  
 EXPNO 27  
 PROCNO 1

F2 - Acquisition Parameters  
 Date\_ 20140502  
 Time 16.38  
 INSTRUM spect  
 PROBHD 5 mm BBO BB-1H  
 PULPROG zg30  
 TD 65536  
 SOLVENT DMSO  
 NS 16  
 DS 2  
 SWH 8278.146 Hz  
 FIDRES 0.126314 Hz  
 AQ 3.9584243 sec  
 RG 1625.5  
 DW 60.400 usec  
 DE 6.00 usec  
 TE 298.0 K  
 D1 1.00000000 sec  
 TDO 1

===== CHANNEL f1 =====  
 NUC1 1H  
 P1 13.50 usec  
 PL1 -1.00 dB  
 SFO1 400.1324710 MHz

F2 - Processing parameters  
 SI 32768  
 SF 400.1300000 MHz  
 WDW EM  
 SSB 0  
 LB 0.30 Hz  
 GB 0  
 PC 1.00

<sup>1</sup>H NMR spectra of compound **10b**



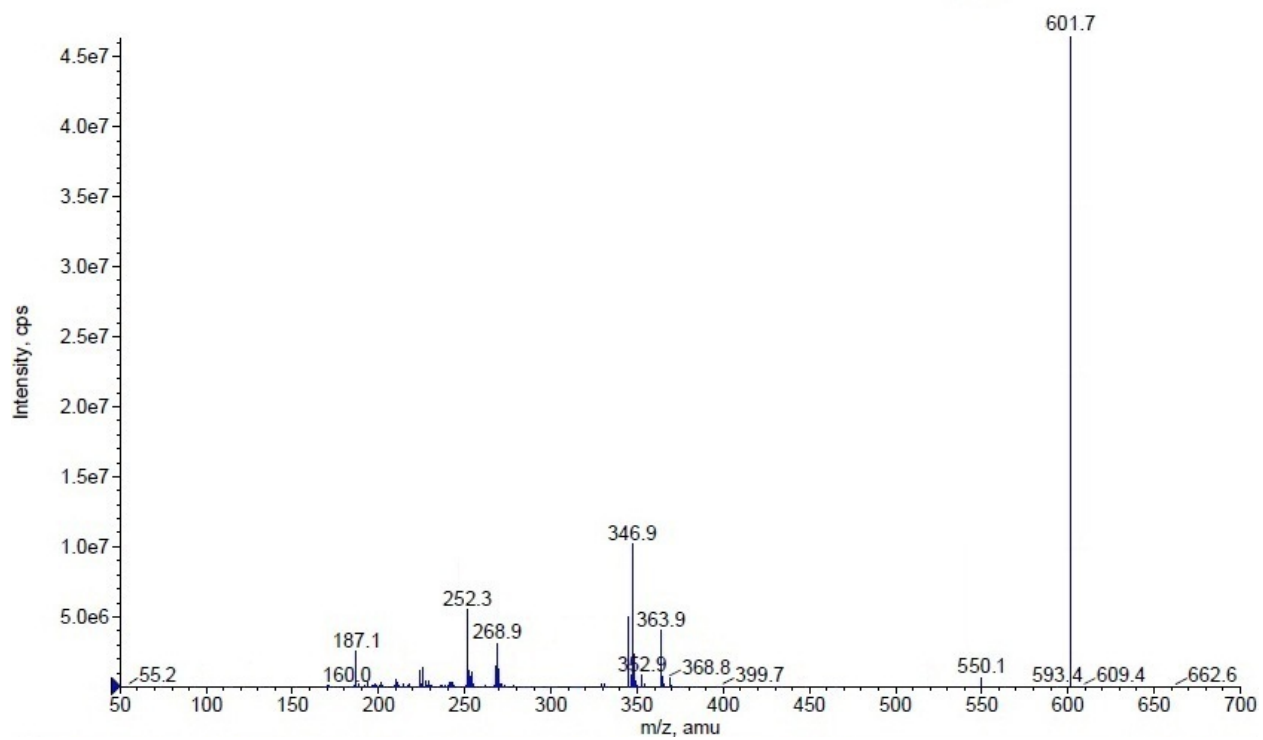

Mass spectra of compound **10b**

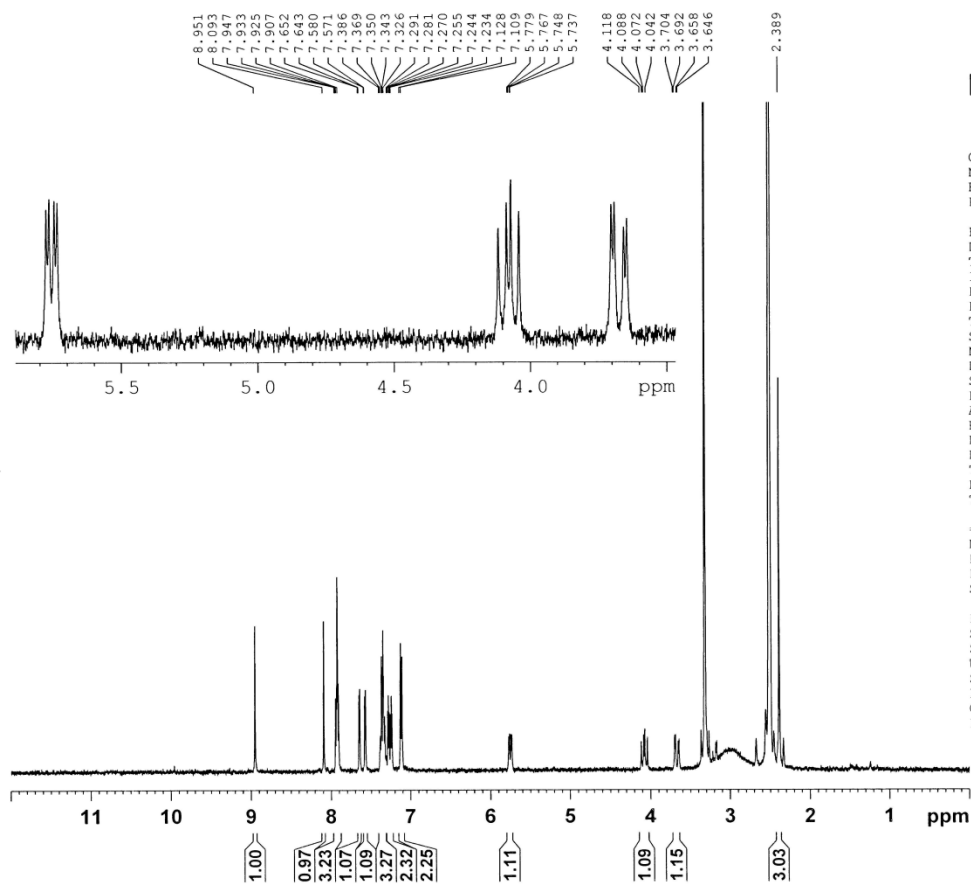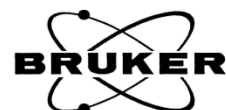

Current Data Parameters  
 NAME DKR  
 EXPNO 15  
 PROCNO 1

F2 - Acquisition Parameters  
 Date\_ 20140416  
 Time 15.32  
 INSTRUM spect  
 PROBHD 5 mm BBO BB-1H  
 PULPROG zg30  
 TD 65536  
 SOLVENT DMSO  
 NS 16  
 DS 2  
 SWH 8278.146 Hz  
 FIDRES 0.126314 Hz  
 AQ 3.9584243 sec  
 RG 1625.5  
 DW 60.400 usec  
 DE 6.00 usec  
 TE 298.1 K  
 D1 1.00000000 sec  
 TDO 1

----- CHANNEL f1 -----  
 NUC1 1H  
 P1 13.50 usec  
 PL1 -1.00 dB  
 SF01 400.1324710 MHz

F2 - Processing parameters  
 SI 32768  
 SF 400.1300000 MHz  
 WDW EM  
 SSB 0  
 LB 0.30 Hz  
 GB 0  
 PC 1.00

<sup>1</sup>H NMR spectra of compound **11a**

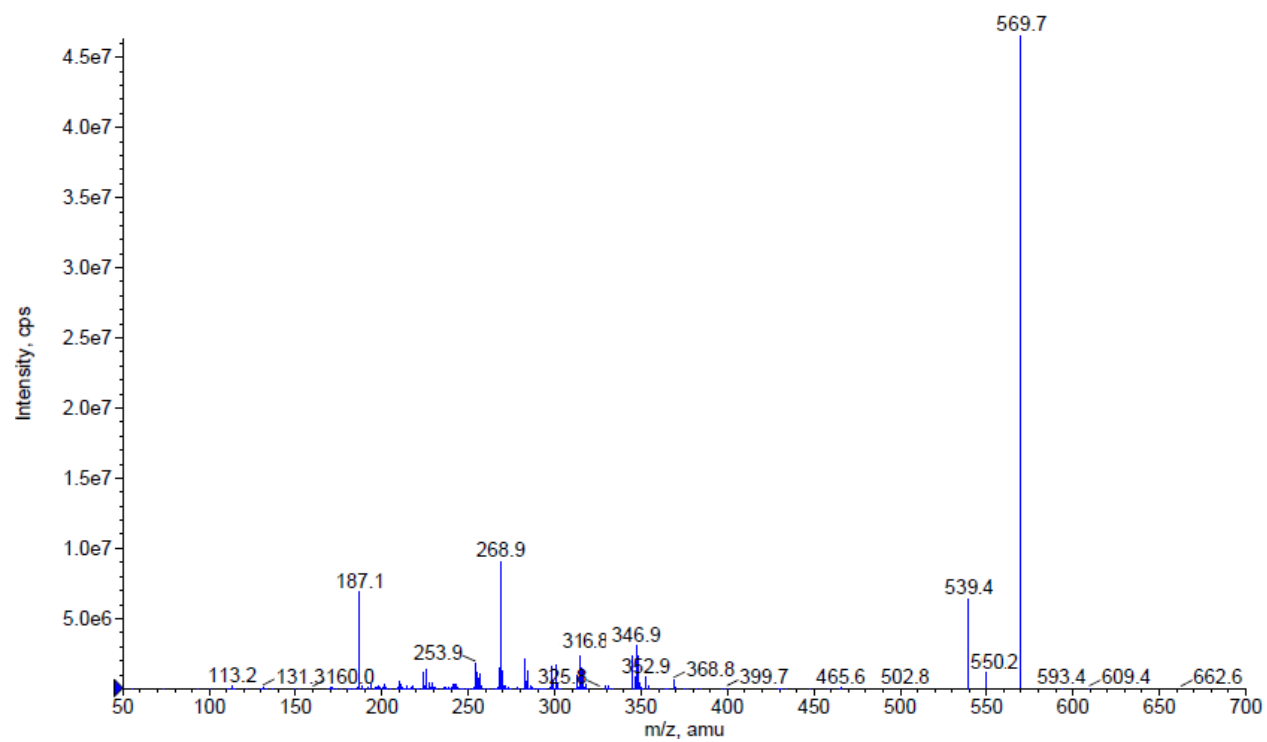

Mass spectra of compound **11a**

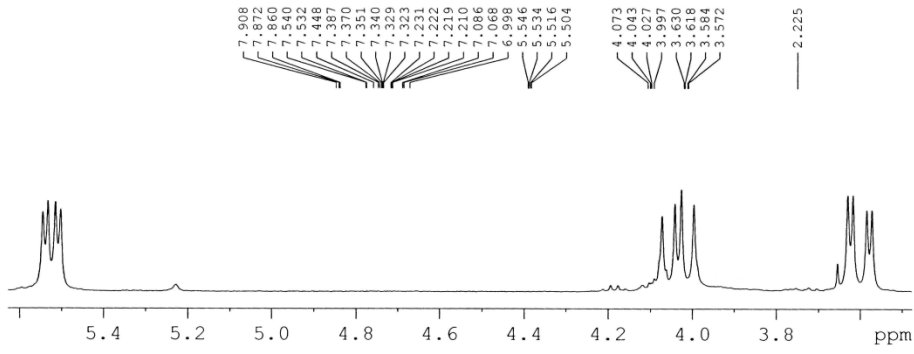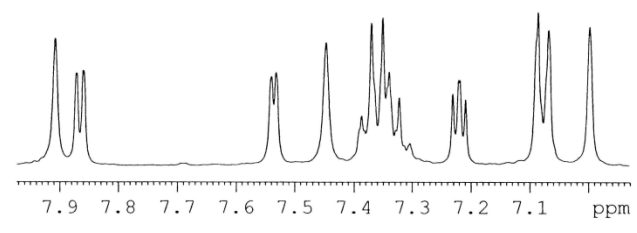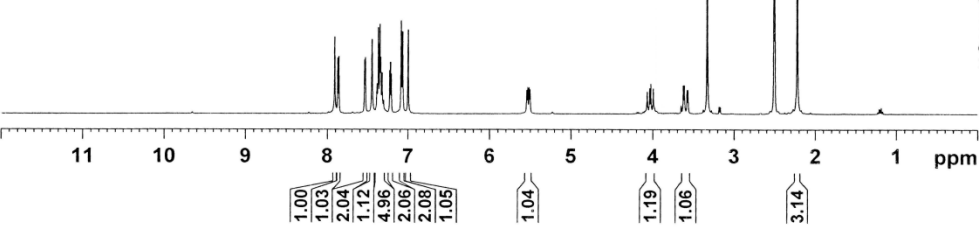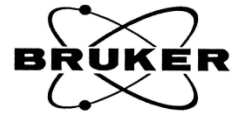

Current Data Parameters  
 NAME DKR  
 EXPNO 4  
 PROCNO 1

F2 - Acquisition Parameters  
 Date\_ 20140122  
 Time 13.54  
 INSTRUM spect  
 PROBHD 5 mm BBO BB-1H  
 PULPROG zg30  
 TD 65536  
 SOLVENT DMSO  
 NS 16  
 DS 2  
 SWH 8278.146 Hz  
 FIDRES 0.126314 Hz  
 AQ 3.9584243 sec  
 RG 574.7  
 DW 60.400 usec  
 DE 6.00 usec  
 TE 298.2 K  
 D1 1.00000000 sec  
 TD0 1

==== CHANNEL f1 =====  
 NUC1 1H  
 P1 13.00 usec  
 PL1 -1.00 dB  
 SFO1 400.1324710 MHz

F2 - Processing parameters  
 SI 32768  
 SF 400.1300000 MHz  
 WDW EM  
 SSB 0  
 LB 0.30 Hz  
 GB 0  
 PC 1.00

<sup>1</sup>H NMR spectra of compound **11b**

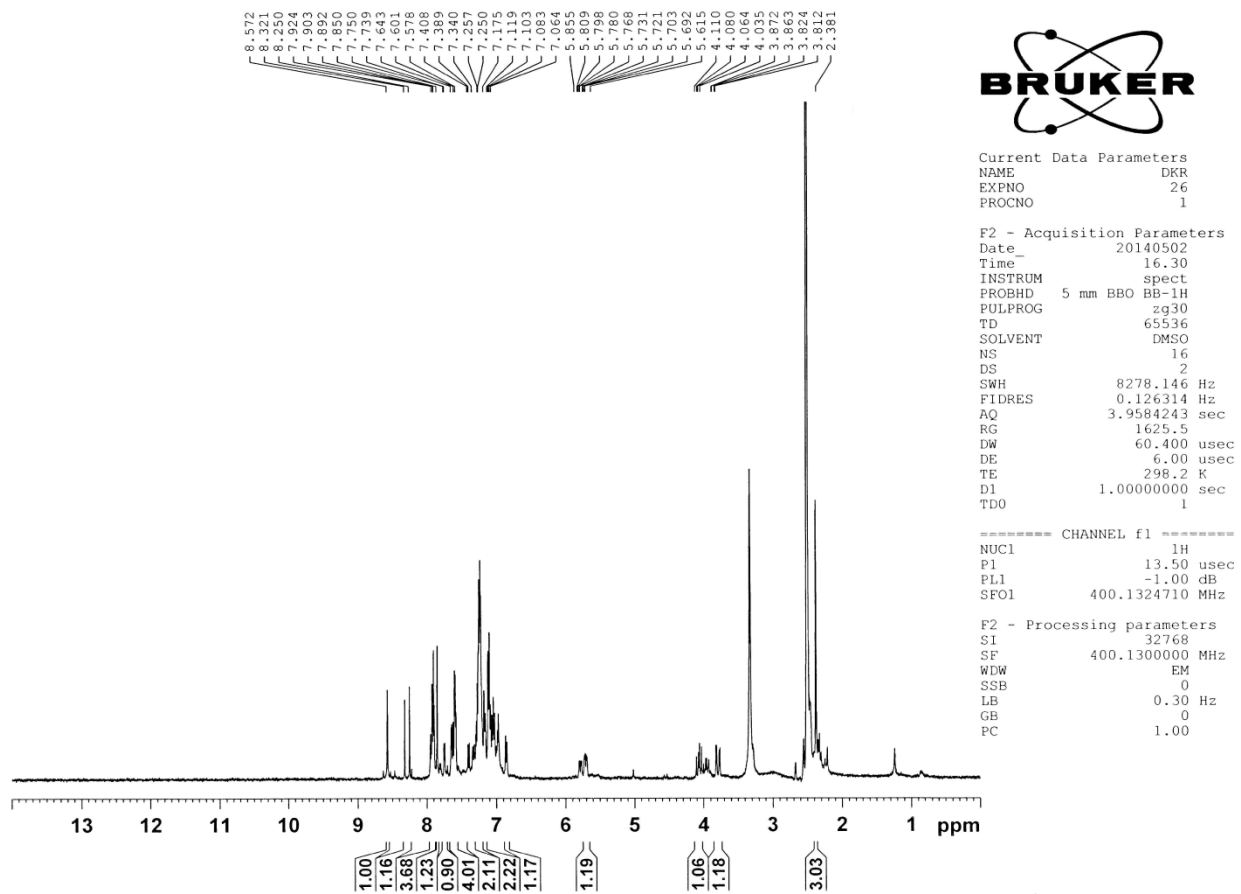

<sup>1</sup>H NMR spectra of compound 11c

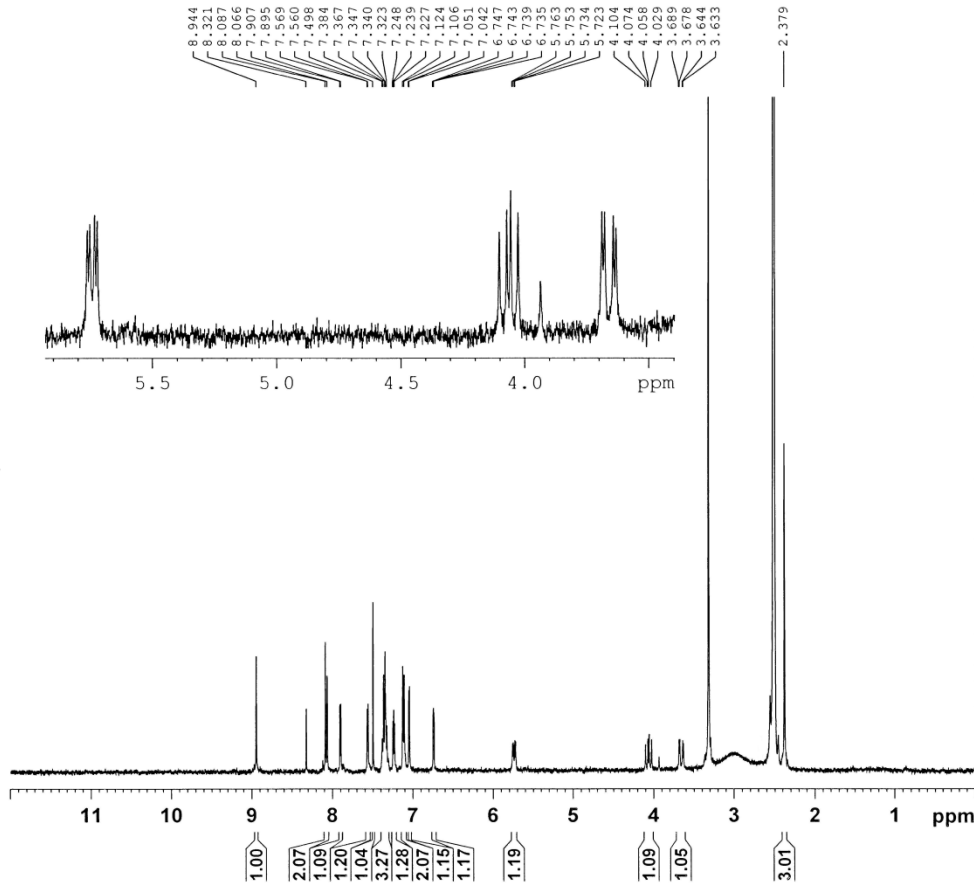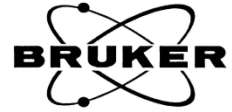

Current Data Parameters  
 NAME DKR  
 EXPNO 18  
 PROCNO 1

F2 - Acquisition Parameters  
 Date\_ 20140416  
 Time 15.58  
 INSTRUM spect  
 PROBHD 5 mm BBO BB-1H  
 PULPROG zg30  
 TD 65536  
 SOLVENT DMSO  
 NS 16  
 DS 2  
 SWH 8278.146 Hz  
 FIDRES 0.126314 Hz  
 AQ 3.9584243 sec  
 RG 2048  
 DW 60.400 usec  
 DE 6.00 usec  
 TE 298.2 K  
 D1 1.0000000 sec  
 TD0 1

==== CHANNEL f1 =====  
 NUC1 1H  
 P1 13.50 usec  
 PL1 -1.00 dB  
 SFO1 400.1324710 MHz

F2 - Processing parameters  
 SI 32768  
 SF 400.1300000 MHz  
 WDW EM  
 SSB 0  
 LB 0.30 Hz  
 GB 0  
 PC 1.00

<sup>1</sup>H NMR spectra of compound **12a**
